## Correction

**Correction: ZNF452 facilitates tumor proliferation and invasion via activating AKT-GSK3 $\beta$  signaling pathway and predicts poor prognosis of non-small cell lung cancer patients****Xiupeng Zhang<sup>1</sup>, Haijing Zhou<sup>1</sup>, Yong Zhang<sup>2</sup>, Lin Cai<sup>1</sup>, Guiyang Jiang<sup>1</sup>, Ailin Li<sup>3</sup>, Yuan Miao<sup>1</sup>, Qingchang Li<sup>1</sup>, Xueshan Qiu<sup>1</sup> and Enhua Wang<sup>1</sup>**<sup>1</sup>Department of Pathology, College of Basic Medicine Science and First Affiliated Hospital of China Medical University, Shenyang, China<sup>2</sup>Department of Pathology, Cancer Hospital of China Medical University, Shenyang, China<sup>3</sup>Department of Radiotherapy, First Affiliated Hospital of China Medical University, Shenyang, China**Published:****Copyright:** © 2021 Zhang et al. This is an open access article distributed under the terms of the [Creative Commons Attribution License](#) (CC BY 3.0), which permits unrestricted use, distribution, and reproduction in any medium, provided the original author and source are credited.

**This article has been corrected:** Due to errors in Figure preparation, the image for siNC (0 & 24 h) is an accidental duplicate of the image for siZNF452 (0 & 24 h) in Figure 4A. In addition, the image for CyclinB1 in Supplementary Figure 1 (row 2, column 2) is an accidental duplicate of the image for N-cadherin in Supplementary Figure 2 (row 5, column 2). The correct Figure 4 and Supplementary Figure 1, produced using the original data, are shown below. The authors declare that these corrections do not change the results or conclusions of this paper.

Original article: Oncotarget. 2017; 8:38863–38875. <https://doi.org/10.18632/oncotarget.16408>

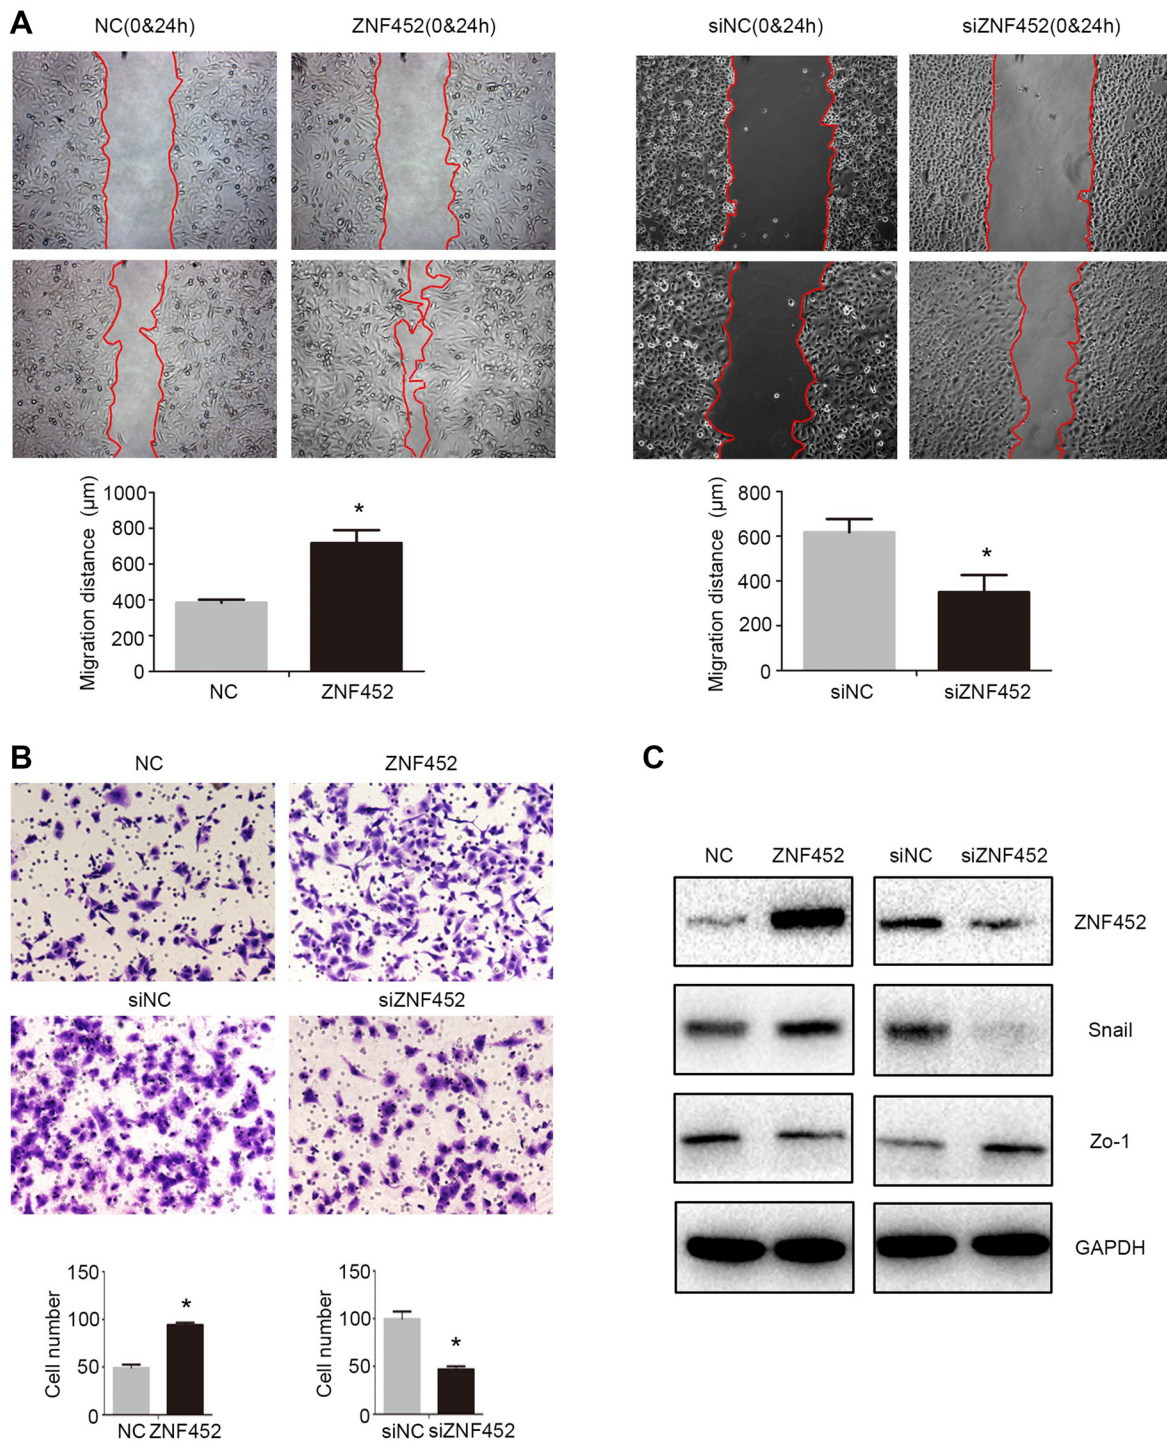

**Figure 4: ZNF452 promoted migration and invasion of NSCLC cells.** Tumor migration (A) and invasion ((B), scale bar = 50  $\mu\text{m}$ ) were also enhanced after overexpressing ZNF452 in A549 cells or depressed after depleting ZNF452 in H1299 cells. Snail was upregulated and Zo-1 was downregulated after transfecting ZNF452 plasmid, whereas Snail was downregulated and Zo-1 was upregulated followed by depleting ZNF452 in H1299 cells (C). \* $P < 0.05$ .

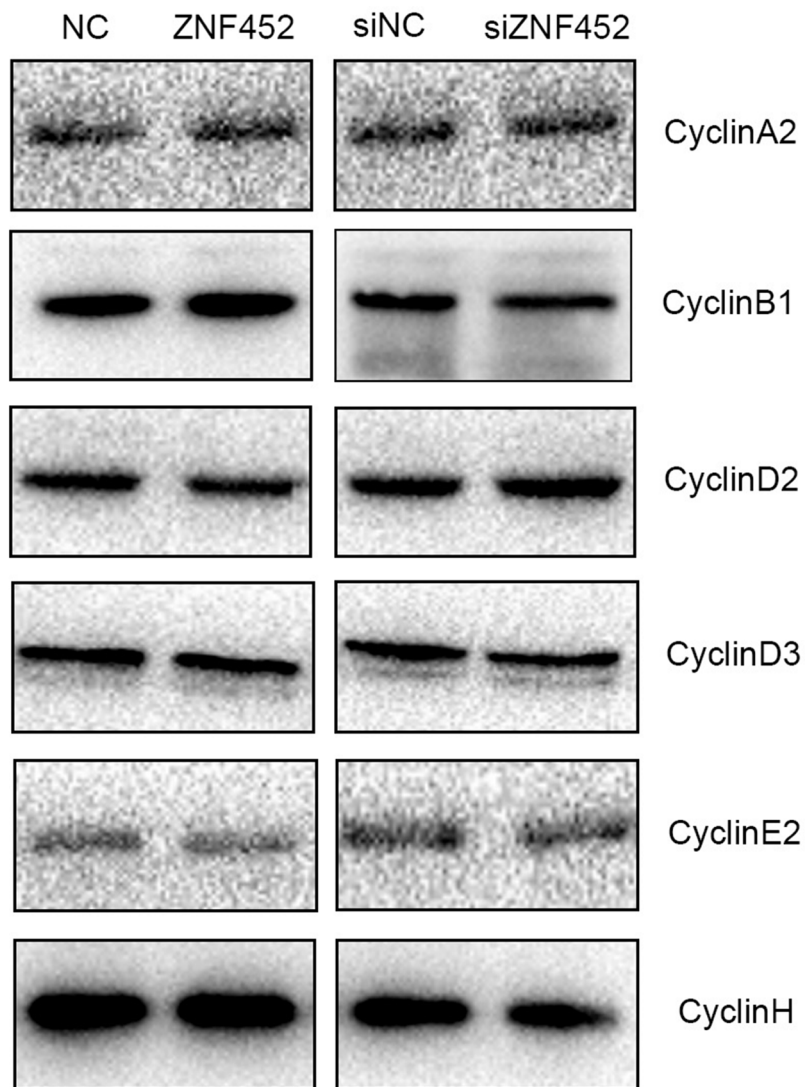

**Supplementary Figure 1: ZNF452 enhance NSCLC proliferation.** CyclinA2, CyclinB1, CyclinD2, CyclinD3, CyclinE2, and CyclinH revealed no significant changes after overexpressing or interfering ZNF452.
